# Supplementary material for: Ashwagandha-induced liver injury—A case series from India and literature review
Source: PubMed Central journal article supplement — Hepatol Commun. 2023 Sep 27;7(10):e0270. doi: 10.1097/HC9.0000000000000270 (PMC10531359; doi:10.1097/hc9.0000000000000270), 2023-09-27
Supplement: hc9-7-e0270-s002.pdf [file hc9-7-e0270-s002.pdf]

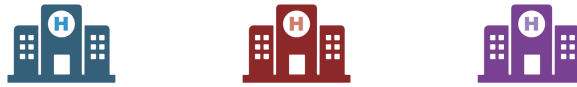

January 2019 - December 2022

Three institutional patient databases

Hospital electronic medical records

Search strategy  
Keyword: 'Ashwagandha'

Total hits: 23 patients

EXCLUDED

N=6  
Active alcohol use

N=3  
Co-medication: NSAID

N=2  
Reactivation of HBV

N=4  
Co-medication: multiherbal

FINAL INCLUSION

N=8  
Acute liver injury due to Ashwagandha alone

Clinical features

Investigations

Liver histology

Retrieved formulations analyses

Clinical outcome

# ASHWAGANDHA & LIVER TOXICITY

Sleep disorders  
Insomnia

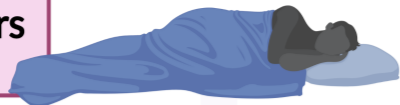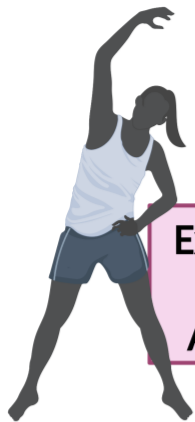

Exercise tolerance  
Muscle growth  
Aerobic capacity

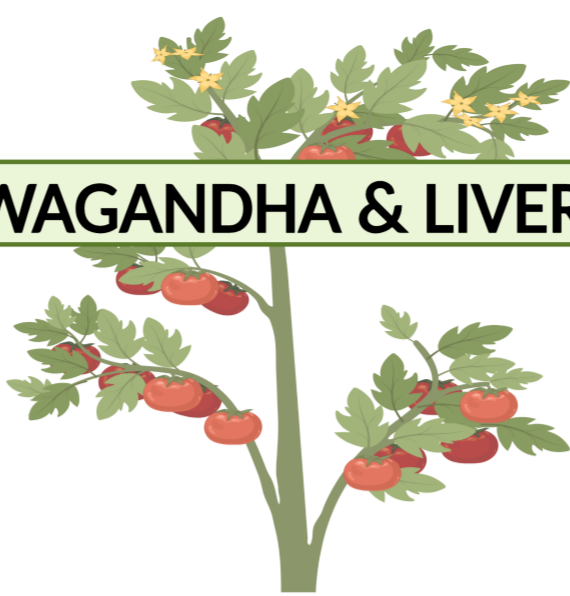

Fatigue  
Sexual health

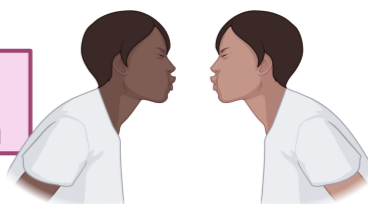

Testosterone booster  
Immunity-booster

Anxiety  
Stress disorder

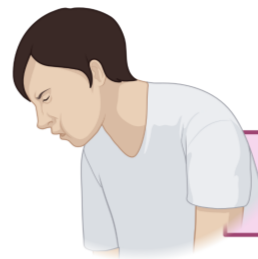

PROMOTED INDICATIONS

LEVEL OF EVIDENCE

LEVEL I: At least one large RCT, low potential for bias or meta-analysis of well conducted-RCTs without heterogeneity

LEVEL II: Small RCT or large RCT with low methodological quality, high potential for bias or meta-analyses of such with heterogeneity

LEVEL III: Prospective cohort studies

LEVEL IV: Retrospective cohort studies or case control studies

LEVEL V: Studies without controls, case reports or expert opinions

LEVEL II

LEVEL II

LEVEL IV

LEVEL V

LEVEL V

PUBLISHED REPORTS ON LIVER TOXICITY

14 reports  
2016 - 2023

Country

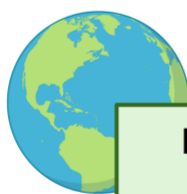

Iceland x 3  
USA x 2  
Japan x 1  
Germany x 1  
Poland x 1

Patients

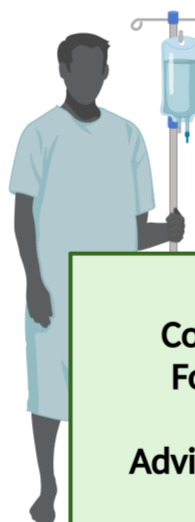

Gender: Predominantly males  
Common indication: Stress, anxiety  
Formulation: Commercial product  
Used: Mostly single ingredient  
Advised by: Mostly self prescribed, OTC  
Duration: 14 days to 365 days

Presentation & Outcomes

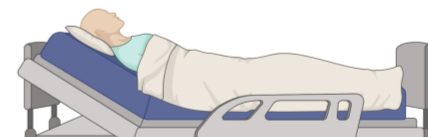

Acute hepatitis with cholestasis most common  
Peak jaundice and pruritus weeks after stopping herb  
Almost always self limiting  
Time to recovery: 20 days to 150 days  
UDCA initiation helped with symptom control  
No chronic herb-induced liver injury  
Very rarely, acute liver failure (one case)

CURRENT STUDY

8 patients

Patients

Gender: Predominantly males  
Common indication: Stress, anxiety  
Formulation: Supplements, food products  
Used: Only single ingredient used  
Advised by: Ayurveda practitioner  
Duration: 14 days to 540 days

Unique Findings

Acute hepatitis with cholestasis most common  
Self limiting in those without CLD  
Presentation with ACLF  
High rate of death in those with CLD  
One case of chronic HILI with autoimmune features  
Time to recovery: 45 days to 95 days
